# Supplementary material for: Unveiling high-resolution, tissue specific dynamic changes in corn stover during ionic liquid pretreatment
Source: Royal Society of Chemistry journal article supplement (doi:10.1039/c2ra20706k), 2012-11-27
Supplement: c2ra20706k.pdf [file c2ra20706k.pdf]

## Supplementary Information

# **Unveiling High-Resolution, Tissue Specific Dynamic Changes in Corn Stover during Ionic Liquid Pretreatment**

Lan Sun<sup>1,2#</sup>, Chenlin Li<sup>1,2#</sup>, Zhengjun Xue<sup>3</sup>, Blake A. Simmons<sup>1,2</sup> and Seema Singh<sup>1,2\*</sup>

<sup>1</sup>Joint BioEnergy Institute, Physical Biosciences Division, Lawrence Berkeley National Laboratory, 5885 Hollis Street, Emeryville, CA 94608

<sup>2</sup>Biomass Science and Conversion Technology Department, Sandia National Laboratories, P.O. Box 969, Livermore, CA 94551

<sup>3</sup>Department of Biological and Agricultural Engineering, University of California, Davis, One Shields Avenue, Davis, CA 95616

#Equal contributors

\*Corresponding author: Seema Singh, telephone number: (925) 337 1453; fax number: (925) 294 3020; email address: [seesing@sandia.gov](mailto:seesing@sandia.gov)

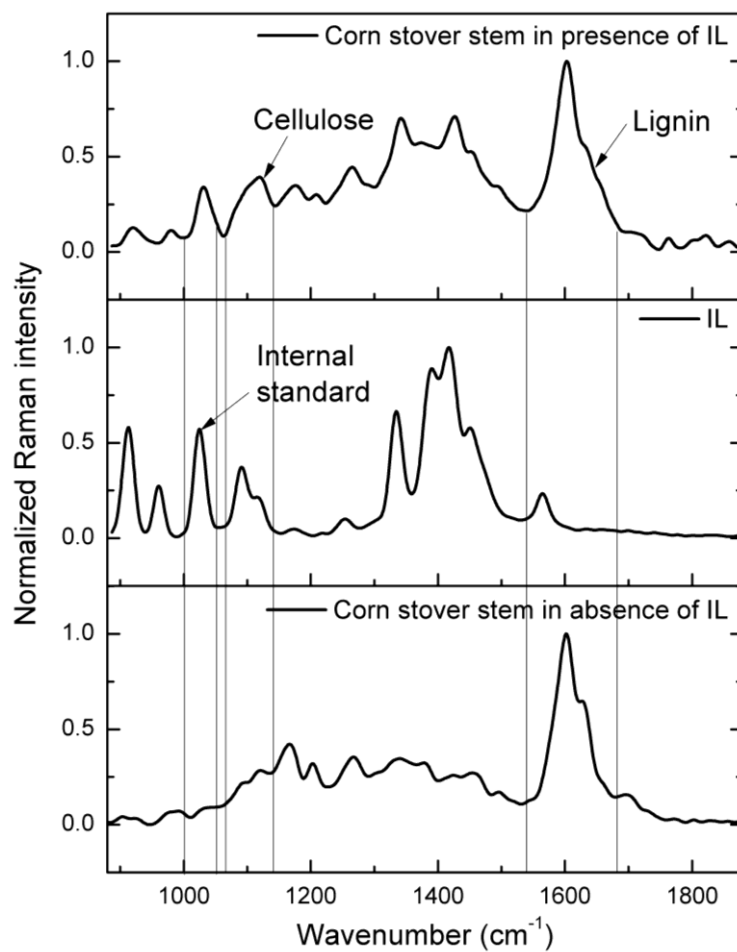

**Fig. S1** Raman spectra of ionic liquid ([C2mim][OAc]) and corn stover stem in presence and in absence of ionic liquid.
